# Supplementary material for: Genome-Wide Analysis of Evolutionary Markers of Human Influenza A(H1N1)pdm09 and A(H3N2) Viruses May Guide Selection of Vaccine Strain Candidates
Source: PubMed Central journal article supplement — Genome Biol Evol. 2015 Nov 27;7(12):3472–83. doi: 10.1093/gbe/evv240 (PMC4700966; doi:10.1093/gbe/evv240), 2015-11-27
Supplement: supp_evv240_Supplementary_rev.pdf [file supp_evv240_Supplementary_rev.pdf]

## Supplementary information

### Genome-wide analysis of evolutionary markers of human influenza A(H1N1)pdm09 and A(H3N2) viruses may guide selection of vaccine strain candidates

Sergei S. Belanov<sup>1</sup>, Dmitrii Bychkov<sup>1</sup>, Christian Benner<sup>1</sup>, Samuli Ripatti<sup>1,2,3</sup>, Teija Ojala<sup>4</sup>, Matti Kankainen<sup>1</sup>, Hong Kai Lee<sup>5</sup>, Julian Wei-Tze Tang<sup>6</sup>, Denis E. Kainov<sup>1</sup>

The supplementary file includes: **Table S1, Table S2, Table S3, Table S4, Table S5, Figure S1, References.**

**Table S1.** Influenza A virus proteins, protein data bank IDs (PDB ID), and references.

| Influenza protein | PDB ID | Reference                   |
|-------------------|--------|-----------------------------|
| HA (H1)           | 3LZG   | (Xu et al. 2010)            |
| HA (H3)           | 4FNK   | (Ekiert et al. 2012)        |
| NA (N1)           | 4B7N   | (van der Vries et al. 2012) |
| NA (N2)           | 1IVG   | (Jedrzejewski et al. 1995)  |
| M2                | 2LY0   | (Wang et al. 2013)          |
| M1                | 3MD2   | n.a.                        |
| Pol               | 4WSB   | (Reich et al. 2014)         |
| NP                | 4IRY   | (Ye et al. 2012)            |
| NS1               | 3F5T   | (Bornholdt and Prasad 2008) |
| PB2:m(7)GTP       | 4CB6   | (Pautus et al. 2013)        |
| HA:CR8020         | 3SDY   | (Ekiert et al. 2011)        |
| HA:39.29          | 3ZTJ   | (Corti et al. 2011)         |
| HA:CR6261         | 3GBN   | (Ekiert et al. 2009)        |
| HA:F10            | 3FKU   | (Sui et al. 2009)           |
| HA:HC45           | 1QFU   | (Fleury et al. 1999)        |
| HA:HC19           | 2VIR   | (Fleury et al. 1998)        |
| HA:HC63           | 1KEN   | (Barbey-Martin et al. 2002) |
| HA:2D1            | 3LZG   | (Xu et al. 2010)            |
| HA:FI6V3          | 3ZTN   | (Corti et al. 2011)         |
| HA:S139/1         | 4GMS   | (Lee et al. 2012)           |
| HA:CH65           | 3SM5   | (Whittle et al. 2011)       |
| HA:F-HB80.4       | 4EEF   | (Whitehead et al. 2012)     |
| HA:HB36.3         | 3R2X   | (Fleishman et al. 2011)     |
| HA:C05            | 4FP8   | (Ekiert et al. 2012)        |
| HA:F045-92        | 4O58   | (Lee et al. 2014)           |
| HA:FLD194         | 5A3I   | (Xiong et al. 2015)         |
| HA:C179           | 5C0R   | (Yassine et al. 2015)       |
| NA:Mem5           | 2AEP   | (Venkatramani et al. 2006)  |
| NA:CD6            | 4QNP   | (Wan et al. 2015)           |
| NA:NC41           | 1NMB   | (Malby et al. 1994)         |

n.a. – not available.

**Table S2.** Frequencies of selected mutations in A(H1N1)pdm09 strains are shown (in HA-gene numbers of residues are shown without 16 amino acids of signal peptide). The evolutionary markers were subdivided into drivers and passengers based on their time of appearance.

| <b>Viral protein</b> | <b>Mutation site</b> | <b>R</b> | <b>A1</b> | <b>A2</b> | <b>2009/<br/>2010</b> | <b>2010/<br/>2011</b> | <b>2011/<br/>2012</b> | <b>2012/<br/>2013</b> | <b>2013/<br/>2014</b> | <b>2014/<br/>2015</b> | <b>ΔF</b> | <b>Drivers</b>    |
|----------------------|----------------------|----------|-----------|-----------|-----------------------|-----------------------|-----------------------|-----------------------|-----------------------|-----------------------|-----------|-------------------|
| HA                   | 98                   | D        | N*        |           | 0,04                  | 0,31                  | 0,25                  | 0,85                  | 0,99                  | 1,00                  | 0,96      | group 4 driver    |
| HA                   | 164                  | K        | Q*        |           | 0,00                  | 0,00                  | 0,00                  | 0,12                  | 0,98                  | 0,99                  | 0,99      | group 7 driver    |
| HA                   | 186                  | S        | T         |           | 0,00                  | 0,63                  | 0,88                  | 0,97                  | 0,99                  | 1,00                  | 1,00      | --                |
| HA                   | 235                  | V        | I         |           | 0,01                  | 0,00                  | 0,00                  | 0,59                  | 0,01                  | 0,00                  | 0,59      | --                |
| HA                   | 257                  | A        | T*        |           | 0,00                  | 0,00                  | 0,00                  | 0,12                  | 0,96                  | 0,99                  | 0,99      | group 7 passenger |
| HA                   | 284                  | K        | E*        |           | 0,01                  | 0,02                  | 0,02                  | 0,95                  | 0,99                  | 0,97                  | 0,98      | --                |
| HA                   | 322                  | I        | V         |           | 0,96                  | 0,99                  | 0,99                  | 0,96                  | 0,82                  | 1,00                  | 0,18      | --                |
| HA                   | 375                  | E        | K*        |           | 0,54                  | 0,84                  | 0,99                  | 0,99                  | 1,00                  | 0,99                  | 0,46      | --                |
| HA                   | 452                  | S        | N         |           | 0,03                  | 0,29                  | 0,88                  | 0,98                  | 1,00                  | 0,99                  | 0,97      | --                |
| HA                   | 475                  | T        | M*        |           | 0,00                  | 0,00                  | 0,01                  | 0,01                  | 0,13                  | 0,00                  | 0,13      | --                |
| HA                   | 500                  | E        | K*        |           | 0,01                  | 0,13                  | 0,10                  | 0,83                  | 0,99                  | 1,00                  | 0,99      | group 4 passenger |
| NA                   | 34                   | I        | V         |           | 0,00                  | 0,00                  | 0,00                  | 0,05                  | 0,88                  | 0,96                  | 0,96      | group 8 passenger |
| NA                   | 44                   | N        | S         |           | 0,00                  | 0,30                  | 0,65                  | 0,86                  | 0,99                  | 1,00                  | 1,00      | --                |
| NA                   | 82                   | S        | P*        |           | 0,02                  | 0,02                  | 0,00                  | 0,01                  | 0,47                  | 0,06                  | 0,47      | --                |
| NA                   | 106                  | V        | I         |           | 0,88                  | 0,99                  | 0,93                  | 0,14                  | 0,00                  | 0,00                  | 0,99      | --                |
| NA                   | 200                  | N        | S         |           | 0,00                  | 0,00                  | 0,05                  | 0,82                  | 0,98                  | 1,00                  | 1,00      | group 5 passenger |
| NA                   | 241                  | V        | I         |           | 0,12                  | 0,68                  | 0,98                  | 0,98                  | 1,00                  | 1,00                  | 0,88      | --                |
| NA                   | 321                  | I        | V         |           | 0,11                  | 0,00                  | 0,01                  | 0,12                  | 0,90                  | 1,00                  | 1,00      | --                |
| NA                   | 369                  | N        | K*        |           | 0,11                  | 0,69                  | 0,98                  | 0,97                  | 1,00                  | 1,00                  | 0,89      | --                |
| NA                   | 386                  | N        | K*        |           | 0,01                  | 0,01                  | 0,00                  | 0,01                  | 0,38                  | 0,91                  | 0,91      | --                |
| NA                   | 432                  | K        | E*        |           | 0,00                  | 0,00                  | 0,00                  | 0,05                  | 0,88                  | 0,99                  | 0,99      | group 8 driver    |
| NA                   | 449                  | N        | K*        |           | 0,00                  | 0,00                  | 0,00                  | 0,01                  | 0,18                  | 0,00                  | 0,18      | --                |

|            |     |   |    |      |      |      |      |      |      |      |                   |
|------------|-----|---|----|------|------|------|------|------|------|------|-------------------|
| <b>M1</b>  | 80  | V | I  | 0,00 | 0,55 | 0,84 | 0,91 | 1,00 | 0,99 | 0,99 | --                |
| <b>M1</b>  | 192 | M | V  | 0,00 | 0,00 | 0,00 | 0,76 | 0,99 | 1,00 | 1,00 | --                |
| <b>M1</b>  | 230 | K | R  | 0,00 | 0,00 | 0,07 | 0,87 | 1,00 | 1,00 | 1,00 | group 5 passenger |
| <b>M2</b>  | 12  | R | K  | 0,00 | 0,01 | 0,00 | 0,03 | 0,55 | 0,00 | 0,55 | --                |
| <b>M2</b>  | 21  | D | G* | 0,00 | 0,01 | 0,10 | 0,89 | 0,99 | 0,40 | 0,99 | group 5 passenger |
| <b>M2</b>  | 21  | D | V* | 0,00 | 0,00 | 0,00 | 0,00 | 0,08 | 0,58 | 0,58 | --                |
| <b>NS1</b> | 55  | E | K* | 0,00 | 0,01 | 0,00 | 0,04 | 0,74 | 0,92 | 0,92 | group 9 driver    |
| <b>NS1</b> | 90  | L | I  | 0,00 | 0,15 | 0,46 | 0,87 | 1,00 | 1,00 | 1,00 | group 2 passenger |
| <b>NS1</b> | 131 | K | E* | 0,00 | 0,00 | 0,07 | 0,05 | 0,76 | 0,92 | 0,92 | --                |
| <b>NS2</b> | 29  | N | S  | 0,00 | 0,00 | 0,00 | 0,04 | 0,73 | 0,84 | 0,84 | group 9 passenger |
| <b>NS2</b> | 48  | T | A* | 0,01 | 0,08 | 0,19 | 0,83 | 0,94 | 1,00 | 0,99 | group 3 driver    |
| <b>NS2</b> | 89  | A | V  | 0,00 | 0,00 | 0,00 | 0,12 | 0,50 | 0,01 | 0,50 | --                |
| <b>NP</b>  | 373 | T | A* | 0,03 | 0,00 | 0,01 | 0,02 | 0,68 | 0,00 | 0,68 | group 6 passenger |
| <b>NP</b>  | 425 | V | I  | 0,04 | 0,04 | 0,00 | 0,02 | 0,64 | 0,55 | 0,64 | group 6 driver    |
| <b>NP</b>  | 498 | S | N  | 0,03 | 0,01 | 0,08 | 0,90 | 0,97 | 1,00 | 0,99 | group 5 passenger |
| <b>PA</b>  | 100 | V | I  | 0,01 | 0,00 | 0,07 | 0,05 | 0,90 | 0,98 | 0,98 | --                |
| <b>PA</b>  | 321 | N | K* | 0,04 | 0,60 | 0,76 | 0,97 | 0,99 | 1,00 | 0,96 | group 1 driver    |
| <b>PA</b>  | 330 | I | V  | 0,00 | 0,21 | 0,27 | 0,06 | 0,92 | 0,94 | 0,94 | --                |
| <b>PA</b>  | 343 | A | T* | 0,76 | 0,83 | 0,57 | 0,91 | 0,08 | 0,01 | 0,90 | --                |
| <b>PA</b>  | 361 | K | R  | 0,00 | 0,00 | 0,00 | 0,04 | 0,89 | 0,98 | 0,98 | group 8 passenger |
| <b>PA</b>  | 441 | M | K* | 0,00 | 0,00 | 0,00 | 0,09 | 0,01 | 0,00 | 0,09 | --                |
| <b>PA</b>  | 459 | I | T  | 0,00 | 0,00 | 0,00 | 0,02 | 0,68 | 0,00 | 0,68 | --                |
| <b>PA</b>  | 615 | K | R  | 0,01 | 0,00 | 0,00 | 0,02 | 0,55 | 0,00 | 0,55 | --                |

|             |     |   |    |      |      |      |      |      |      |      |                   |
|-------------|-----|---|----|------|------|------|------|------|------|------|-------------------|
| <b>PA-X</b> | 100 | V | I  | 0,03 | 0,00 | 0,08 | 0,06 | 0,93 | na   | 0,93 | --                |
| <b>PA-X</b> | 221 | R | Q* | 0,01 | 0,65 | 0,76 | 0,96 | 1,00 | na   | 0,99 | group 1 passenger |
| <b>PA-X</b> | 229 | L | S* | 0,00 | 0,16 | 0,27 | 0,07 | 0,94 | na   | 0,94 | --                |
| <b>PB1</b>  | 154 | G | D* | 0,01 | 0,04 | 0,25 | 0,93 | 0,97 | 1,00 | 0,99 | --                |
| <b>PB1</b>  | 397 | I | M  | 0,01 | 0,15 | 0,47 | 0,91 | 0,99 | 0,91 | 0,98 | group 2 driver    |
| <b>PB1</b>  | 375 | S | N  | 0,04 | 0,01 | 0,00 | 0,02 | 0,68 | 0,06 | 0,68 | group 6 passenger |
| <b>PB1</b>  | 435 | I | T* | 0,10 | 0,27 | 0,68 | 0,96 | 1,00 | 1,00 | 0,90 | --                |
| <b>PB1</b>  | 646 | M | I  | 0,00 | 0,00 | 0,00 | 0,01 | 0,62 | 0,00 | 0,62 | --                |
| <b>PB2</b>  | 54  | R | K  | 0,01 | 0,02 | 0,08 | 0,92 | 0,97 | 0,99 | 0,98 | group 5 passenger |
| <b>PB2</b>  | 66  | M | I  | 0,01 | 0,00 | 0,05 | 0,95 | 1,00 | 0,99 | 0,99 | group 5 driver    |
| <b>PB2</b>  | 195 | D | N* | 0,00 | 0,03 | 0,19 | 0,97 | 1,00 | 0,99 | 0,99 | group 3 passenger |
| <b>PB2</b>  | 293 | R | K  | 0,00 | 0,05 | 0,17 | 0,96 | 1,00 | 0,99 | 0,99 | group 3 passenger |
| <b>PB2</b>  | 344 | V | M  | 0,01 | 0,62 | 0,75 | 0,97 | 1,00 | 1,00 | 0,99 | group 1 passenger |
| <b>PB2</b>  | 354 | I | L  | 0,00 | 0,62 | 0,75 | 0,98 | 1,00 | 1,00 | 1,00 | group 1 passenger |
| <b>PB2</b>  | 389 | R | K  | 0,00 | 0,00 | 0,00 | 0,02 | 0,68 | 0,00 | 0,68 | --                |
| <b>PB2</b>  | 731 | V | I  | 0,01 | 0,03 | 0,17 | 0,94 | 0,99 | 0,98 | 0,98 | group 3 passenger |

na - not available; R- amino acid in reference reference sequence; A1 – amino acid in analysed sequences; A2 – another amino acid in analysed sequences;  $\Delta F$  – difference between minimal and maximal frequencies of amino acid change during 5 years period; \* - possibly radical amino acid change.

**Table S3.** Frequencies of selected mutations in A(H3N2) strains (in HA-gene numbers of residues are shown without 16 amino acids of signal peptide). The evolutionary markers were subdivided into drivers and passengers based on their time of appearance.

| <b>Viral protein</b> | <b>Mutation site</b> | <b>R</b> | <b>A1</b> | <b>A2</b> | <b>2009/2010</b> | <b>2010/2011</b> | <b>2011/2012</b> | <b>2012/2013</b> | <b>2013/2014</b> | <b>2014/2015</b> | <b><math>\Delta F</math></b> | <b>Drivers</b>    |
|----------------------|----------------------|----------|-----------|-----------|------------------|------------------|------------------|------------------|------------------|------------------|------------------------------|-------------------|
| <b>HA</b>            | 3                    | L        | I         |           | 0,08             | 0,01             | 0,04             | 0,06             | 0,21             | 0,68             | 0,67                         | --                |
| <b>HA</b>            | 33                   | Q        | R*        |           | 0,00             | 0,00             | 0,18             | 0,74             | 0,97             | 0,99             | 0,99                         | group 4 passenger |

|    |     |   |    |      |      |      |      |      |      |      |                   |
|----|-----|---|----|------|------|------|------|------|------|------|-------------------|
| HA | 45  | S | N  | 0,02 | 0,07 | 0,26 | 0,84 | 1,00 | 1,00 | 0,98 | group 5 driver    |
| HA | 48  | T | I* | 0,00 | 0,02 | 0,24 | 0,85 | 1,00 | 0,99 | 0,99 | group 5 passenger |
| HA | 53  | D | N* | 0,06 | 0,39 | 0,33 | 0,14 | 0,06 | 0,02 | 0,37 | group 3 driver    |
| HA | 62  | E | K* | 0,48 | 0,05 | 0,02 | 0,00 | 0,01 | 0,14 | 0,48 | --                |
| HA | 94  | Y | H* | 0,02 | 0,39 | 0,31 | 0,14 | 0,06 | 0,03 | 0,37 | group 3 passenger |
| HA | 122 | N | D* | 0,00 | 0,00 | 0,00 | 0,00 | 0,03 | 0,14 | 0,14 | --                |
| HA | 128 | T | A* | 0,00 | 0,00 | 0,00 | 0,36 | 0,69 | 0,33 | 0,69 | --                |
| HA | 138 | A | S* | 0,00 | 0,01 | 0,00 | 0,01 | 0,11 | 0,10 | 0,11 | --                |
| HA | 142 | R | G* | 0,00 | 0,04 | 0,09 | 0,38 | 0,69 | 0,33 | 0,38 | --                |
| HA | 144 | N | K* | 0,41 | 0,05 | 0,00 | 0,01 | 0,00 | 0,00 | 0,41 | --                |
| HA | 144 | N | S  | 0,00 | 0,00 | 0,00 | 0,00 | 0,19 | 0,70 | 0,70 | group 9 driver    |
| HA | 145 | N | S  | 0,00 | 0,04 | 0,49 | 0,81 | 1,00 | 1,00 | 1,00 | group 6 passenger |
| HA | 157 | L | S* | 0,01 | 0,00 | 0,00 | 0,03 | 0,13 | 0,18 | 0,18 | --                |
| HA | 159 | F | Y* | 0,00 | 0,00 | 0,02 | 0,00 | 0,16 | 0,70 | 0,70 | group 7 driver    |
| HA | 160 | K | T* | 0,00 | 0,00 | 0,00 | 0,00 | 0,15 | 0,69 | 0,69 | group 7 passenger |
| HA | 198 | A | S* | 0,00 | 0,74 | 0,64 | 0,83 | 1,00 | 0,99 | 1,00 | --                |
| HA | 223 | V | I  | 0,01 | 0,09 | 0,63 | 0,86 | 1,00 | 1,00 | 1,00 | group 6 driver    |
| HA | 225 | N | D* | 0,01 | 0,03 | 0,03 | 0,02 | 0,31 | 0,79 | 0,79 | --                |
| HA | 278 | N | K* | 0,00 | 0,01 | 0,19 | 0,81 | 0,99 | 1,00 | 1,00 | group 4 passenger |
| HA | 311 | Q | H* | 0,00 | 0,00 | 0,00 | 0,00 | 0,19 | 0,65 | 0,65 | group 9 passenger |
| HA | 312 | N | S  | 0,24 | 0,27 | 0,63 | 0,83 | 0,99 | 1,00 | 0,76 | --                |
| HA | 347 | V | M  | 0,00 | 0,11 | 0,02 | 0,16 | 0,24 | 0,04 | 0,24 | --                |
| HA | 347 | V | K* | 0,00 | 0,00 | 0,00 | 0,00 | 0,09 | 0,16 | 0,16 | --                |

|            |     |   |    |      |      |      |      |      |      |      |                   |
|------------|-----|---|----|------|------|------|------|------|------|------|-------------------|
| <b>HA</b>  | 487 | D | N* | 0,00 | 0,07 | 0,41 | 0,03 | 0,00 | 0,00 | 0,41 | --                |
| <b>HA</b>  | 489 | D | N* | 0,19 | 0,04 | 0,02 | 0,23 | 0,31 | 0,66 | 0,64 | --                |
| <b>NA</b>  | 81  | L | P* | 0,00 | 0,00 | 0,67 | 0,95 | 0,99 | 1,00 | 1,00 | --                |
| <b>NA</b>  | 93  | D | G* | 0,00 | 0,02 | 0,18 | 0,83 | 0,99 | 0,99 | 0,99 | group 4 driver    |
| <b>NA</b>  | 221 | E | D  | 0,00 | 0,00 | 0,03 | 0,04 | 0,50 | 0,93 | 0,93 | --                |
| <b>NA</b>  | 267 | T | K* | 0,00 | 0,00 | 0,00 | 0,00 | 0,04 | 0,69 | 0,69 | group 8 driver    |
| <b>NA</b>  | 380 | I | V  | 0,00 | 0,00 | 0,00 | 0,00 | 0,00 | 0,65 | 0,65 | --                |
| <b>NA</b>  | 392 | I | T* | 0,00 | 0,00 | 0,01 | 0,00 | 0,31 | 0,13 | 0,31 | --                |
| <b>M2</b>  | 54  | L | V  | 0,00 | 0,00 | 0,00 | 0,00 | 0,17 | 0,06 | 0,17 | --                |
| <b>NP</b>  | 217 | S | G  | 0,00 | 0,03 | 0,00 | 0,00 | 0,01 | 0,10 | 0,10 | --                |
| <b>NP</b>  | 421 | E | D* | 0,00 | 0,00 | 0,00 | 0,00 | 0,06 | 0,16 | 0,16 | group 10 driver   |
| <b>NS1</b> | 26  | E | K* | 0,06 | 0,14 | 0,31 | 0,87 | 0,97 | 1,00 | 0,94 | --                |
| <b>NS1</b> | 124 | M | I  | 0,01 | 0,00 | 0,00 | 0,00 | 0,01 | 0,11 | 0,11 | --                |
| <b>NS1</b> | 129 | M | T* | 0,05 | 0,53 | 0,49 | 0,14 | 0,00 | 0,00 | 0,53 | group 2 driver    |
| <b>NS1</b> | 135 | S | N  | 0,49 | 0,42 | 0,45 | 0,92 | 0,99 | 1,00 | 0,58 | group 1 passenger |
| <b>NS1</b> | 139 | D | G* | 0,48 | 0,42 | 0,45 | 0,92 | 0,99 | 0,99 | 0,57 | group 1 passenger |
| <b>NS1</b> | 229 | K | E* | 0,00 | 0,00 | 0,09 | 0,89 | 1,00 | 1,00 | 1,00 | group 5 passenger |
| <b>NS2</b> | 27  | D | G* | 0,00 | 0,00 | 0,00 | 0,01 | 0,05 | 0,18 | 0,18 | --                |
| <b>NS2</b> | 88  | K | R  | 0,49 | 0,42 | 0,44 | 0,85 | 0,99 | 1,00 | 0,58 | group 1 passenger |
| <b>NS2</b> | 92  | N | S  | 0,04 | 0,51 | 0,49 | 0,13 | 0,03 | 0,00 | 0,51 | group 2 passenger |
| <b>PA</b>  | 256 | Q | K* | 0,00 | 0,00 | 0,00 | 0,01 | 0,02 | 0,10 | 0,10 | --                |
| <b>PA</b>  | 272 | N | S  | 0,00 | 0,00 | 0,00 | 0,00 | 0,06 | 0,69 | 0,69 | group 8 driver    |
| <b>PA</b>  | 308 | I | V  | 0,00 | 0,00 | 0,01 | 0,00 | 0,01 | 0,11 | 0,11 | --                |
| <b>PA</b>  | 396 | D | E* | 0,97 | 0,99 | 0,95 | 0,98 | 0,99 | 0,84 | 0,15 | --                |

|            |     |   |    |      |      |      |      |      |      |      |                    |
|------------|-----|---|----|------|------|------|------|------|------|------|--------------------|
| <b>PA</b>  | 407 | I | M  | 0,00 | 0,01 | 0,00 | 0,00 | 0,01 | 0,11 | 0,11 | --                 |
| <b>PA</b>  | 409 | N | S  | 0,40 | 0,22 | 0,43 | 0,84 | 0,99 | 1,00 | 0,78 | --                 |
| <b>PA</b>  | 554 | I | V  | 0,00 | 0,00 | 0,00 | 0,00 | 0,01 | 0,11 | 0,11 | --                 |
| <b>PA</b>  | 605 | K | R  | 0,00 | 0,00 | 0,00 | 0,03 | 0,01 | 0,11 | 0,11 | --                 |
| <b>PA</b>  | 668 | V | I  | 0,00 | 0,00 | 0,05 | 0,12 | 0,13 | 0,39 | 0,39 | --                 |
| <b>PA</b>  | 669 | V | I  | 0,00 | 0,00 | 0,00 | 0,00 | 0,01 | 0,11 | 0,11 | --                 |
| <b>PA</b>  | 675 | N | K* | 0,00 | 0,00 | 0,00 | 0,12 | 0,12 | 0,61 | 0,61 | --                 |
| <b>PB1</b> | 331 | E | D  | 0,00 | 0,00 | 0,00 | 0,00 | 0,06 | 0,14 | 0,14 | group 10 passenger |
| <b>PB1</b> | 587 | A | T* | 0,50 | 0,45 | 0,44 | 0,94 | 0,99 | 0,98 | 0,55 | group 1 passenger  |
| <b>PB1</b> | 745 | K | R  | 0,43 | 0,77 | 0,52 | 0,15 | 0,00 | 0,00 | 0,77 | --                 |
| <b>PB2</b> | 63  | I | V  | 0,47 | 0,42 | 0,43 | 0,85 | 0,97 | 0,34 | 0,63 | group 1 driver     |
| <b>PB2</b> | 81  | M | I  | 0,04 | 0,52 | 0,53 | 0,13 | 0,01 | 0,00 | 0,53 | group 2 passenger  |
| <b>PB2</b> | 221 | A | S* | 0,06 | 0,53 | 0,54 | 0,13 | 0,01 | 0,00 | 0,54 | group 2 driver     |
| <b>PB2</b> | 293 | R | K  | 0,06 | 0,53 | 0,55 | 0,13 | 0,00 | 0,00 | 0,55 | group 2 passenger  |
| <b>PB2</b> | 353 | K | R  | 0,94 | 0,44 | 0,40 | 0,88 | 0,99 | 1,00 | 0,60 | --                 |
| <b>PB2</b> | 461 | I | V  | 0,48 | 0,42 | 0,44 | 0,85 | 1,00 | 1,00 | 0,58 | group 1 passenger  |
| <b>PB2</b> | 560 | V | I  | 0,07 | 0,56 | 0,55 | 0,14 | 0,00 | 0,00 | 0,56 | group 2 passenger  |
| <b>PB2</b> | 588 | I | T* | 0,00 | 0,00 | 0,03 | 0,06 | 0,07 | 0,35 | 0,35 | --                 |
| <b>PB2</b> | 613 | T | A* | 0,00 | 0,11 | 0,39 | 0,80 | 0,39 | 1,00 | 1,00 | --                 |

na - not available; R- amino acid in reference sequence; A1 – amino acid in analysed sequences; A2 – another amino acid in analysed sequences;  $\Delta F$  – difference between minimal and maximal frequencies of amino acid change during 5 years period; \* - possibly radical amino acid change.

**Table S4.** The prevalence of evolutionary markers in A(H1N1)pdm09 vaccine strain candidates recommended by WHO for previous influenza seasons (in HA-gene numbers of residues are shown without 16 amino acids of signal peptide).

| <b>2010/2011</b>                    |                                    |          |                                            |
|-------------------------------------|------------------------------------|----------|--------------------------------------------|
| <b>Vir<br/>al<br/>prot<br/>ein*</b> | <b>Mut<br/>atio<br/>n<br/>site</b> | <b>R</b> | <b>A1<br/>(A/Californi<br/>a/07/2009 )</b> |
| <b>HA</b>                           | 186                                | T        | S                                          |

|                        |     |   |              |
|------------------------|-----|---|--------------|
| <b>HA</b>              | 322 | V | I            |
| <b>HA</b>              | 375 | K | E            |
| <b>NA</b>              | 106 | I | V            |
| <b>NA</b>              | 241 | I | V            |
| <b>NA</b>              | 369 | K | N            |
| <b>M1</b>              | 80  | I | V            |
| <b>PA</b>              | 321 | K | N            |
| <b>PA</b>              | 343 | T | A            |
| <b>PB2</b>             | 344 | M | V            |
| <b>PB2</b>             | 354 | L | I            |
| <b>Matches (total)</b> |     |   | <b>0(11)</b> |

**2011/2012**

| <b>Vir<br/>al<br/>prot<br/>ein*</b> | <b>Mut<br/>atio<br/>n<br/>site</b> | <b>R</b> | <b>A1<br/>(A/Californi<br/>a/07/2009 )</b> |
|-------------------------------------|------------------------------------|----------|--------------------------------------------|
| <b>HA</b>                           | 186                                | T        | S                                          |
| <b>HA</b>                           | 322                                | V        | I                                          |
| <b>HA</b>                           | 375                                | K        | E                                          |
| <b>HA</b>                           | 452                                | N        | S                                          |
| <b>NA</b>                           | 44                                 | S        | N                                          |
| <b>NA</b>                           | 106                                | I        | V                                          |
| <b>NA</b>                           | 241                                | I        | V                                          |
| <b>NA</b>                           | 369                                | K        | N                                          |
| <b>M1</b>                           | 80                                 | I        | V                                          |
| <b>PA</b>                           | 321                                | K        | N                                          |
| <b>PA</b>                           | 343                                | T        | A                                          |
| <b>PB1</b>                          | 435                                | T        | I                                          |
| <b>PB2</b>                          | 344                                | M        | V                                          |
| <b>PB2</b>                          | 354                                | L        | I                                          |
| <b>Matches (total)</b>              |                                    |          | <b>0(14)</b>                               |

**2012/2013**

| <b>Vir<br/>al<br/>prot<br/>ein*</b> | <b>Mut<br/>atio<br/>n<br/>site</b> | <b>R</b> | <b>A1<br/>(A/Californi<br/>a/07/2009)</b> | <b>A2<br/>(A/Christchu<br/>rch/16/2010)</b> | <b>A3<br/>(A/Brisban<br/>e/10/2010)</b> | <b>A4<br/>(A/Californ<br/>ia/04/2009)</b> | <b>A5<br/>(A/Texas/<br/>05/2009)</b> | <b>A6<br/>(A/England<br/>/195/2009)</b> | <b>A7<br/>(A/New<br/>York/1<br/>8/2009)</b> |
|-------------------------------------|------------------------------------|----------|-------------------------------------------|---------------------------------------------|-----------------------------------------|-------------------------------------------|--------------------------------------|-----------------------------------------|---------------------------------------------|
| <b>HA</b>                           | 93                                 | N        | D                                         | D                                           | D                                       | D                                         | D                                    | D                                       | D                                           |
| <b>HA</b>                           | 186                                | T        | S                                         | S                                           | S                                       | S                                         | S                                    | S                                       | S                                           |
| <b>HA</b>                           | 235                                | I        | V                                         | V                                           | V                                       | V                                         | V                                    | V                                       | V                                           |
| <b>HA</b>                           | 284                                | E        | K                                         | K                                           | K                                       | K                                         | K                                    | K                                       | K                                           |
| <b>HA</b>                           | 322                                | V        | I                                         | V                                           | V                                       | I                                         | V                                    | V                                       | V                                           |
| <b>HA</b>                           | 375                                | K        | E                                         | K                                           | K                                       | E                                         | E                                    | E                                       | E                                           |
| <b>HA</b>                           | 452                                | N        | S                                         | S                                           | S                                       | S                                         | S                                    | S                                       | S                                           |
| <b>HA</b>                           | 500                                | K        | E                                         | E                                           | E                                       | E                                         | E                                    | E                                       | E                                           |
| <b>NA</b>                           | 44                                 | S        | N                                         | N                                           | N                                       | N                                         | N                                    | N                                       | N                                           |
| <b>NA</b>                           | 200                                | S        | N                                         | N                                           | N                                       | N                                         | N                                    | N                                       | N                                           |
| <b>NA</b>                           | 241                                | I        | V                                         | V                                           | V                                       | V                                         | V                                    | V                                       | V                                           |
| <b>NA</b>                           | 369                                | K        | N                                         | N                                           | N                                       | N                                         | N                                    | N                                       | N                                           |
| <b>M1</b>                           | 80                                 | I        | V                                         | V                                           | V                                       | V                                         | V                                    | V                                       | V                                           |
| <b>M1</b>                           | 192                                | V        | M                                         | M                                           | M                                       | M                                         | M                                    | M                                       | M                                           |
| <b>M1</b>                           | 230                                | R        | K                                         | K                                           | K                                       | K                                         | K                                    | K                                       | K                                           |
| <b>M2</b>                           | 21                                 | G        | D                                         | D                                           | D                                       | D                                         | D                                    | D                                       | D                                           |



|                      |     |   |              |               |               |              |              |              |              |
|----------------------|-----|---|--------------|---------------|---------------|--------------|--------------|--------------|--------------|
| <b>NS1</b>           | 90  | I | L            | na            | na            | L            | L            | L            | L            |
| <b>NS2</b>           | 48  | A | T            | na            | na            | T            | T            | T            | T            |
| <b>NP</b>            | 498 | N | S            | na            | na            | S            | S            | S            | S            |
| <b>PA</b>            | 321 | K | N            | na            | na            | N            | N            | N            | N            |
| <b>PA</b>            | 343 | T | A            | na            | na            | A            | A            | A            | A            |
| <b>PB1</b>           | 154 | D | G            | na            | na            | G            | G            | G            | G            |
| <b>PB1</b>           | 397 | M | I            | na            | na            | I            | I            | I            | I            |
| <b>PB1</b>           | 435 | T | I            | na            | na            | I            | I            | I            | I            |
| <b>PB2</b>           | 54  | K | R            | na            | na            | R            | R            | R            | R            |
| <b>PB2</b>           | 66  | I | M            | na            | na            | M            | M            | M            | M            |
| <b>PB2</b>           | 195 | N | D            | na            | na            | D            | D            | D            | D            |
| <b>PB2</b>           | 293 | K | R            | na            | na            | R            | R            | R            | R            |
| <b>PB2</b>           | 344 | M | V            | na            | na            | V            | V            | V            | V            |
| <b>PB2</b>           | 354 | L | I            | na            | na            | I            | I            | I            | I            |
| <b>PB2</b>           | 731 | I | V            | na            | na            | V            | V            | V            | V            |
| <b>Total matches</b> |     |   | <b>0(31)</b> | <b>≥2(31)</b> | <b>≥2(31)</b> | <b>0(31)</b> | <b>1(31)</b> | <b>1(31)</b> | <b>1(31)</b> |

### 2013/2014

| Vir al prot ein* | Mut atio n site | R | A1 (A/Californi a/07/2009) | A2 (A/Christchu rch/16/2010) | A3 (A/Brisban e/10/2010) | A4 (A/Californ ia/04/2009) | A5 (A/Texas/ 05/2009) | A6 (A/England /195/2009) | A7 (A/New York/1 8/2009) |
|------------------|-----------------|---|----------------------------|------------------------------|--------------------------|----------------------------|-----------------------|--------------------------|--------------------------|
| <b>HA</b>        | 93              | N | D                          | D                            | D                        | D                          | D                     | D                        | D                        |
| <b>HA</b>        | 186             | Q | K                          | K                            | K                        | K                          | K                     | K                        | K                        |
| <b>HA</b>        | 235             | T | S                          | S                            | S                        | S                          | S                     | S                        | S                        |
| <b>HA</b>        | 257             | T | A                          | A                            | A                        | T                          | T                     | T                        | T                        |
| <b>HA</b>        | 284             | E | K                          | K                            | K                        | K                          | K                     | K                        | K                        |
| <b>HA</b>        | 322             | V | I                          | V                            | V                        | I                          | V                     | V                        | V                        |
| <b>HA</b>        | 375             | K | E                          | K                            | K                        | E                          | E                     | E                        | E                        |
| <b>HA</b>        | 452             | N | S                          | S                            | S                        | S                          | S                     | S                        | S                        |
| <b>HA</b>        | 500             | K | E                          | E                            | E                        | E                          | E                     | E                        | E                        |
| <b>NA</b>        | 34              | V | I                          | I                            | I                        | I                          | I                     | I                        | I                        |
| <b>NA</b>        | 44              | S | N                          | N                            | N                        | N                          | N                     | N                        | N                        |
| <b>NA</b>        | 82              | P | S                          | S                            | S                        | S                          | S                     | S                        | S                        |
| <b>NA</b>        | 200             | S | N                          | N                            | N                        | N                          | N                     | N                        | N                        |
| <b>NA</b>        | 241             | I | V                          | V                            | V                        | V                          | V                     | V                        | V                        |
| <b>NA</b>        | 321             | V | I                          | I                            | I                        | I                          | I                     | I                        | I                        |
| <b>NA</b>        | 369             | K | N                          | N                            | N                        | N                          | N                     | N                        | N                        |
| <b>NA</b>        | 432             | E | K                          | K                            | K                        | K                          | K                     | K                        | K                        |
| <b>M1</b>        | 80              | I | V                          | V                            | V                        | V                          | V                     | V                        | V                        |
| <b>M1</b>        | 192             | V | M                          | M                            | M                        | M                          | M                     | M                        | M                        |
| <b>M1</b>        | 230             | R | R                          | K                            | K                        | K                          | K                     | K                        | K                        |
| <b>M2</b>        | 12              | K | R                          | R                            | R                        | R                          | R                     | R                        | R                        |
| <b>M2</b>        | 21              | G | D                          | D                            | D                        | D                          | D                     | D                        | D                        |
| <b>NS1</b>       | 55              | K | E                          | na                           | na                       | E                          | E                     | E                        | E                        |
| <b>NS1</b>       | 90              | I | L                          | na                           | na                       | L                          | L                     | L                        | L                        |
| <b>NS1</b>       | 131             | E | K                          | na                           | na                       | K                          | K                     | K                        | K                        |
| <b>NS2</b>       | 29              | S | N                          | na                           | na                       | N                          | N                     | N                        | N                        |
| <b>NS2</b>       | 48              | A | T                          | na                           | na                       | T                          | T                     | T                        | T                        |
| <b>NS2</b>       | 89              | V | A                          | na                           | na                       | A                          | A                     | A                        | A                        |
| <b>NP</b>        | 373             | A | T                          | na                           | na                       | T                          | T                     | T                        | T                        |
| <b>NP</b>        | 425             | I | V                          | na                           | na                       | V                          | V                     | V                        | V                        |
| <b>NP</b>        | 498             | N | S                          | na                           | na                       | S                          | S                     | S                        | S                        |
| <b>PA</b>        | 100             | I | V                          | na                           | na                       | V                          | V                     | V                        | V                        |

|                        |     |   |              |               |               |              |              |              |              |
|------------------------|-----|---|--------------|---------------|---------------|--------------|--------------|--------------|--------------|
| <b>PA</b>              | 321 | K | N            | na            | na            | N            | N            | N            | N            |
| <b>PA</b>              | 330 | V | I            | na            | na            | I            | I            | I            | I            |
| <b>PA</b>              | 361 | R | K            | na            | na            | K            | K            | K            | K            |
| <b>PA</b>              | 459 | T | I            | na            | na            | I            | I            | I            | I            |
| <b>PA</b>              | 615 | R | K            | na            | na            | K            | K            | K            | K            |
| <b>PB1</b>             | 154 | D | G            | na            | na            | G            | G            | G            | G            |
| <b>PB1</b>             | 397 | M | I            | na            | na            | I            | I            | I            | I            |
| <b>PB1</b>             | 375 | N | S            | na            | na            | S            | S            | S            | S            |
| <b>PB1</b>             | 435 | T | I            | na            | na            | I            | I            | I            | I            |
| <b>PB1</b>             | 646 | I | M            | na            | na            | M            | M            | M            | M            |
| <b>PB2</b>             | 54  | K | R            | na            | na            | R            | R            | R            | R            |
| <b>PB2</b>             | 66  | I | M            | na            | na            | M            | M            | M            | M            |
| <b>PB2</b>             | 195 | N | D            | na            | na            | D            | D            | D            | D            |
| <b>PB2</b>             | 293 | K | R            | na            | na            | R            | R            | R            | R            |
| <b>PB2</b>             | 344 | M | V            | na            | na            | V            | V            | V            | V            |
| <b>PB2</b>             | 354 | L | I            | na            | na            | I            | I            | I            | I            |
| <b>PB2</b>             | 389 | K | R            | na            | na            | R            | R            | R            | R            |
| <b>PB2</b>             | 731 | I | V            | na            | na            | V            | V            | V            | V            |
| <b>Matches (total)</b> |     |   | <b>0(50)</b> | <b>≥2(50)</b> | <b>≥2(50)</b> | <b>0(50)</b> | <b>1(50)</b> | <b>1(50)</b> | <b>1(50)</b> |

#### 2014/2015

| <b>Vir al prot ein*</b> | <b>Mut atio n site</b> | <b>R</b> | <b>A1 (A/Californi a/07/2009)</b> | <b>A2 (A/Christchu rch/16/2010)</b> | <b>A3 (A/Brisban e/10/2010)</b> | <b>A4 (A/Californ ia/04/2009)</b> | <b>A5 (A/Texas/ 05/2009)</b> | <b>A6 (A/England /195/2009)</b> | <b>A7 (A/New York/1 8/2009)</b> |
|-------------------------|------------------------|----------|-----------------------------------|-------------------------------------|---------------------------------|-----------------------------------|------------------------------|---------------------------------|---------------------------------|
| <b>HA</b>               | 93                     | N        | D                                 | D                                   | D                               | D                                 | D                            | D                               | D                               |
| <b>HA</b>               | 186                    | Q        | K                                 | K                                   | K                               | K                                 | K                            | K                               | K                               |
| <b>HA</b>               | 235                    | T        | S                                 | S                                   | S                               | T                                 | T                            | T                               | T                               |
| <b>HA</b>               | 257                    | T        | A                                 | A                                   | A                               | A                                 | A                            | A                               | A                               |
| <b>HA</b>               | 284                    | E        | E                                 | E                                   | E                               | K                                 | K                            | K                               | K                               |
| <b>HA</b>               | 322                    | V        | I                                 | V                                   | V                               | I                                 | V                            | V                               | V                               |
| <b>HA</b>               | 375                    | K        | E                                 | K                                   | K                               | E                                 | E                            | E                               | E                               |
| <b>HA</b>               | 452                    | N        | S                                 | S                                   | S                               | S                                 | S                            | S                               | S                               |
| <b>HA</b>               | 500                    | K        | E                                 | E                                   | E                               | E                                 | E                            | E                               | E                               |
| <b>NA</b>               | 34                     | V        | I                                 | I                                   | I                               | I                                 | I                            | I                               | I                               |
| <b>NA</b>               | 44                     | S        | N                                 | N                                   | N                               | N                                 | N                            | N                               | N                               |
| <b>NA</b>               | 200                    | S        | N                                 | N                                   | N                               | N                                 | N                            | N                               | N                               |
| <b>NA</b>               | 241                    | I        | V                                 | V                                   | V                               | V                                 | V                            | V                               | V                               |
| <b>NA</b>               | 321                    | V        | I                                 | I                                   | I                               | I                                 | I                            | I                               | I                               |
| <b>NA</b>               | 369                    | K        | N                                 | N                                   | N                               | N                                 | N                            | N                               | N                               |
| <b>NA</b>               | 386                    | K        | N                                 | N                                   | N                               | N                                 | N                            | N                               | N                               |
| <b>NA</b>               | 432                    | E        | K                                 | K                                   | K                               | K                                 | K                            | K                               | K                               |
| <b>M1</b>               | 80                     | I        | V                                 | V                                   | V                               | V                                 | V                            | V                               | V                               |
| <b>M1</b>               | 192                    | V        | M                                 | M                                   | M                               | M                                 | M                            | M                               | M                               |
| <b>M1</b>               | 230                    | R        | R                                 | K                                   | K                               | K                                 | K                            | K                               | K                               |
| <b>M2</b>               | 21                     | V        | D                                 | G                                   | D                               | D                                 | D                            | D                               | D                               |
| <b>NS1</b>              | 55                     | K        | E                                 | na                                  | na                              | E                                 | E                            | E                               | E                               |
| <b>NS1</b>              | 90                     | I        | L                                 | na                                  | na                              | L                                 | L                            | L                               | L                               |
| <b>NS1</b>              | 131                    | E        | K                                 | na                                  | na                              | K                                 | K                            | K                               | K                               |
| <b>NS2</b>              | 29                     | S        | N                                 | na                                  | na                              | N                                 | N                            | N                               | N                               |
| <b>NS2</b>              | 48                     | A        | T                                 | na                                  | na                              | T                                 | T                            | T                               | T                               |
| <b>NP</b>               | 425                    | I        | V                                 | na                                  | na                              | V                                 | V                            | V                               | V                               |
| <b>NP</b>               | 498                    | N        | S                                 | na                                  | na                              | S                                 | S                            | S                               | S                               |
| <b>PA</b>               | 100                    | I        | V                                 | na                                  | na                              | V                                 | V                            | V                               | V                               |

|                        |     |   |              |               |               |              |              |              |              |
|------------------------|-----|---|--------------|---------------|---------------|--------------|--------------|--------------|--------------|
| <b>PA</b>              | 321 | K | N            | na            | na            | N            | N            | N            | N            |
| <b>PA</b>              | 330 | V | I            | na            | na            | I            | I            | I            | I            |
| <b>PA</b>              | 361 | R | K            | na            | na            | K            | K            | K            | K            |
| <b>PB1</b>             | 154 | D | G            | na            | na            | G            | G            | G            | G            |
| <b>PB1</b>             | 397 | M | I            | na            | na            | I            | I            | I            | I            |
| <b>PB1</b>             | 435 | T | I            | na            | na            | I            | I            | I            | I            |
| <b>PB2</b>             | 54  | K | R            | na            | na            | R            | R            | R            | R            |
| <b>PB2</b>             | 66  | I | M            | na            | na            | M            | M            | M            | M            |
| <b>PB2</b>             | 195 | N | D            | na            | na            | D            | D            | D            | D            |
| <b>PB2</b>             | 293 | K | R            | na            | na            | R            | R            | R            | R            |
| <b>PB2</b>             | 344 | M | V            | na            | na            | V            | V            | V            | V            |
| <b>PB2</b>             | 354 | L | I            | na            | na            | I            | I            | I            | I            |
| <b>PB2</b>             | 731 | I | V            | na            | na            | V            | V            | V            | V            |
| <b>Matches (total)</b> |     |   | <b>0(42)</b> | <b>≥2(42)</b> | <b>≥2(42)</b> | <b>0(42)</b> | <b>1(42)</b> | <b>1(42)</b> | <b>1(42)</b> |

na - not available; R- amino acid in reference reference sequence; A1-7 – amino acid in corresponding vaccine strains. PA-X was excluded from the analysis.

**Table S5.** The prevalence of evolutionary markers in A(H3N2) vaccine strain candidates recommended by WHO for previous influenza seasons (in HA-gene numbers of residues are shown without 16 amino acids of signal peptide).

**2010/2011**

| <b>Viral protein*</b>  | <b>Mutation site</b> | <b>R</b> | <b>A1 (A/Perth/16/2009)</b> | <b>A2 (A/Wisconsin/15/2009)</b> |
|------------------------|----------------------|----------|-----------------------------|---------------------------------|
| <b>HA</b>              | 198                  | S        | A                           | A                               |
| <b>NS1</b>             | 129                  | T        | M                           | M                               |
| <b>NS2</b>             | 92                   | S        | S                           | na                              |
| <b>PA</b>              | 396                  | E        | D                           | na                              |
| <b>PB1</b>             | 745                  | R        | K                           | na                              |
| <b>PB2</b>             | 81                   | I        | M                           | na                              |
| <b>PB2</b>             | 221                  | S        | A                           | na                              |
| <b>PB2</b>             | 293                  | K        | R                           | na                              |
| <b>PB2</b>             | 560                  | I        | V                           | na                              |
| <b>Matches (total)</b> |                      |          | <b>1(9)</b>                 | <b>≥0(9)</b>                    |

**2011/2012**

| <b>Viral protein*</b>  | <b>Mutation site</b> | <b>R</b> | <b>A1 (A/Perth/16/2009)</b> |
|------------------------|----------------------|----------|-----------------------------|
| <b>HA</b>              | 198                  | S        | A                           |
| <b>HA</b>              | 223                  | I        | V                           |
| <b>HA</b>              | 312                  | S        | N                           |
| <b>NA</b>              | 81                   | P        | L                           |
| <b>PA</b>              | 396                  | E        | D                           |
| <b>PB1</b>             | 745                  | R        | K                           |
| <b>PB2</b>             | 81                   | I        | M                           |
| <b>PB2</b>             | 221                  | S        | A                           |
| <b>PB2</b>             | 293                  | K        | R                           |
| <b>PB2</b>             | 560                  | I        | V                           |
| <b>Matches (total)</b> |                      |          | <b>0(10)</b>                |

**2012/2013**

| <b>Viral protein*</b> | <b>Mutation site</b> | <b>R</b> | <b>A2</b> |
|-----------------------|----------------------|----------|-----------|
|-----------------------|----------------------|----------|-----------|

|                        |     |   | (A/Victoria/361/2011) |
|------------------------|-----|---|-----------------------|
| HA                     | 33  | R | Q                     |
| HA                     | 45  | N | N                     |
| HA                     | 48  | I | I                     |
| HA                     | 145 | S | N                     |
| HA                     | 198 | S | S                     |
| HA                     | 223 | I | I                     |
| HA                     | 278 | K | N                     |
| HA                     | 312 | S | S                     |
| NA                     | 81  | P | P                     |
| NA                     | 93  | G | G                     |
| NS1                    | 26  | K | E                     |
| NS1                    | 135 | N | N                     |
| NS1                    | 139 | G | G                     |
| NS1                    | 229 | E | K                     |
| NS2                    | 88  | R | R                     |
| PA                     | 396 | E | D                     |
| PA                     | 409 | S | S                     |
| PB1                    | 587 | T | T                     |
| PB2                    | 63  | V | V                     |
| PB2                    | 353 | R | R                     |
| PB2                    | 461 | V | V                     |
| PB2                    | 613 | A | A                     |
| <b>Matches (total)</b> |     |   | <b>16(22)</b>         |

**2013/2014**

| Viral protein* | Mutation site | R | A1 (A/Texas/50/2012) |
|----------------|---------------|---|----------------------|
| HA             | 33            | R | R                    |
| HA             | 45            | N | N                    |
| HA             | 48            | I | I                    |
| HA             | 128           | A | N                    |
| HA             | 142           | G | R                    |
| HA             | 145           | S | N                    |
| HA             | 198           | S | S                    |
| HA             | 223           | I | I                    |
| HA             | 278           | K | K                    |
| HA             | 312           | S | S                    |
| NA             | 81            | P | P                    |
| NA             | 93            | G | G                    |
| NA             | 221           | D | E                    |
| NS1            | 26            | K | E                    |
| NS1            | 135           | N | N                    |
| NS1            | 139           | G | G                    |
| NS1            | 229           | E | E                    |
| NS2            | 88            | R | R                    |
| PA             | 396           | E | E                    |

|                        |     |   |               |
|------------------------|-----|---|---------------|
| <b>PA</b>              | 409 | S | S             |
| <b>PB1</b>             | 587 | T | T             |
| <b>PB2</b>             | 63  | V | V             |
| <b>PB2</b>             | 353 | R | R             |
| <b>PB2</b>             | 461 | V | V             |
| <b>Matches (total)</b> |     |   | <b>19(24)</b> |

**2014/2015**

| <b>Viral protein*</b>  | <b>Mutation site</b> | <b>R</b> | <b>A1 (A/New York/39/2012)</b> | <b>A2 (A/Almaty/2958/2013)</b> |
|------------------------|----------------------|----------|--------------------------------|--------------------------------|
| <b>HA</b>              | 3                    | I        | L                              | L                              |
| <b>HA</b>              | 33                   | R        | R                              | R                              |
| <b>HA</b>              | 45                   | N        | N                              | N                              |
| <b>HA</b>              | 48                   | I        | I                              | I                              |
| <b>HA</b>              | 144                  | S        | N                              | N                              |
| <b>HA</b>              | 145                  | S        | S                              | S                              |
| <b>HA</b>              | 159                  | Y        | F                              | F                              |
| <b>HA</b>              | 160                  | T        | K                              | K                              |
| <b>HA</b>              | 198                  | S        | S                              | S                              |
| <b>HA</b>              | 223                  | I        | I                              | I                              |
| <b>HA</b>              | 225                  | D        | N                              | N                              |
| <b>HA</b>              | 278                  | K        | K                              | K                              |
| <b>HA</b>              | 311                  | H        | Q                              | Q                              |
| <b>HA</b>              | 312                  | S        | S                              | S                              |
| <b>HA</b>              | 489                  | N        | D                              | D                              |
| <b>NA</b>              | 81                   | P        | P                              | P                              |
| <b>NA</b>              | 93                   | G        | G                              | G                              |
| <b>NA</b>              | 221                  | D        | E                              | E                              |
| <b>NA</b>              | 267                  | K        | T                              | T                              |
| <b>NA</b>              | 380                  | V        | V                              | I                              |
| <b>NS1</b>             | 26                   | K        | K                              | K                              |
| <b>NS1</b>             | 135                  | N        | N                              | N                              |
| <b>NS1</b>             | 139                  | G        | G                              | G                              |
| <b>NS1</b>             | 229                  | E        | E                              | E                              |
| <b>NS2</b>             | 88                   | R        | R                              | R                              |
| <b>PA</b>              | 272                  | S        | N                              | N                              |
| <b>PA</b>              | 396                  | E        | E                              | E                              |
| <b>PA</b>              | 409                  | S        | S                              | S                              |
| <b>PA</b>              | 675                  | K        | N                              | N                              |
| <b>PB1</b>             | 587                  | T        | T                              | T                              |
| <b>PB2</b>             | 353                  | R        | R                              | R                              |
| <b>PB2</b>             | 461                  | V        | V                              | V                              |
| <b>PB2</b>             | 613                  | A        | A                              | A                              |
| <b>Matches (total)</b> |                      |          | <b>20(33)</b>                  | <b>20(33)</b>                  |

na - not available; R- amino acid in reference reference sequence; A1-7 – amino acid in corresponding vaccine strains. PA-X was excluded from the analysis.

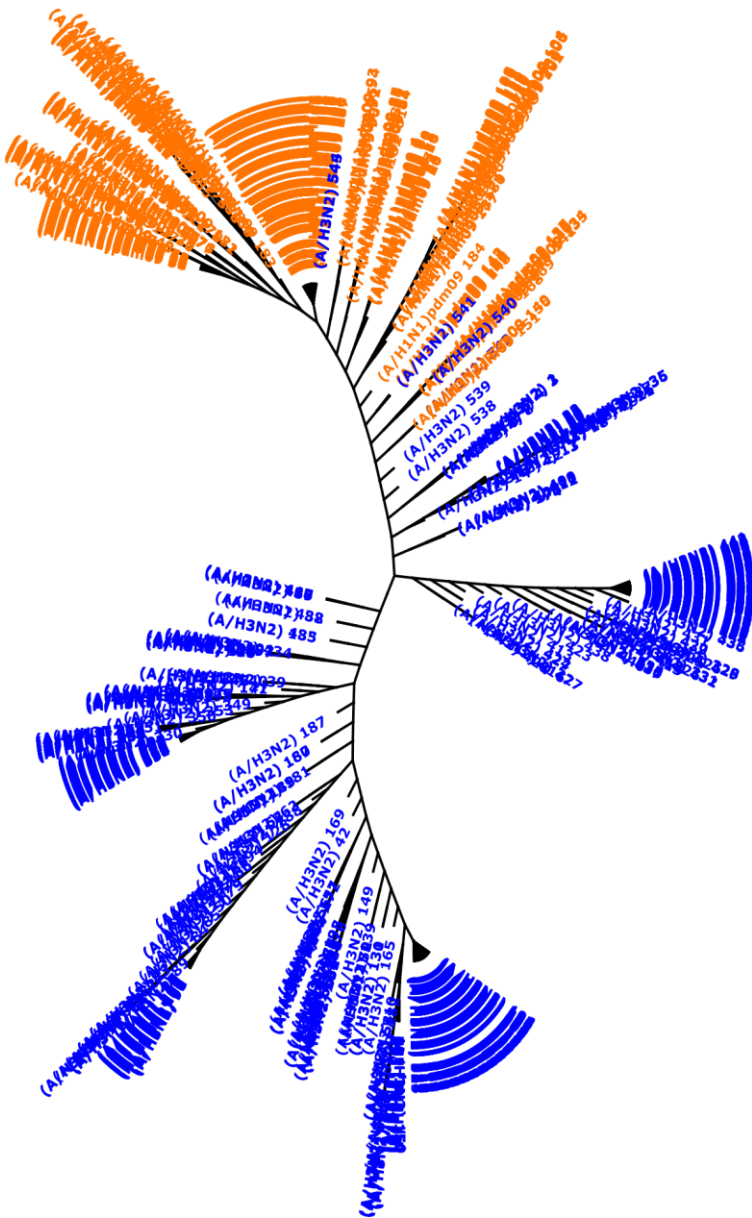

**Fig S1.** Reassortment of PB1 segments between human influenza A(H3N2) and A(H1N1)pdm09 viruses which were circulating in the world in 2013. Phylogenetic tree was built using 277 influenza A(H1N1)pdm09 (colored orange) and 548 influenza A(H3N2) (colored blue) PB1 protein sequences available in public databases.

**References**

Barbey-Martin C *et al.* 2002. An antibody that prevents the hemagglutinin low pH fusogenic transition. *Virology* 294, 70-74.

Bornholdt ZA, and Prasad, BV. 2008. X-ray structure of NS1 from a highly pathogenic H5N1 influenza virus. *Nature* 456, 985-988.

Corti D *et al.* 2011. A neutralizing antibody selected from plasma cells that binds to group 1 and group 2 influenza A hemagglutinins. *Science* 333, 850-856.

Ekiert DC *et al.* 2009. Antibody recognition of a highly conserved influenza virus epitope. *Science* 324, 246-251.

Ekiert DC *et al.* 2011. A highly conserved neutralizing epitope on group 2 influenza A viruses. *Science* 333, 843-850.

Ekiert DC *et al.* 2012. Cross-neutralization of influenza A viruses mediated by a single antibody loop. *Nature* 489, 526-532.

Fleishman SJ *et al.* 2011. Computational design of proteins targeting the conserved stem region of influenza hemagglutinin. *Science* 332, 816-821.

Fleury D *et al.* 1999. A complex of influenza hemagglutinin with a neutralizing antibody that binds outside the virus receptor binding site. *Nat Struct Biol* 6, 530-534.

Fleury D *et al.* 1998. Antigen distortion allows influenza virus to escape neutralization. *Nat Struct Biol* 5, 119-123.

Jedrzejewski MJ *et al.* 1995. Structures of aromatic inhibitors of influenza virus neuraminidase. *Biochemistry* 34, 3144-3151.

Lee PS *et al.* 2014. Receptor mimicry by antibody F045-092 facilitates universal binding to the H3 subtype of influenza virus. *Nat Commun* 5, 3614.

Lee PS *et al.* 2012. Heterosubtypic antibody recognition of the influenza virus hemagglutinin receptor binding site enhanced by avidity. *Proceedings of the National Academy of Sciences of the United States of America* 109, 17040-17045.

Malby RL *et al.* 1994. The structure of a complex between the NC10 antibody and influenza virus neuraminidase and comparison with the overlapping binding site of the NC41 antibody. *Structure* 2, 733-746.

Pautus S *et al.* 2013. New 7-methylguanine derivatives targeting the influenza polymerase PB2 cap-binding domain. *J Med Chem* 56, 8915-8930.

Reich S *et al.* 2014. Structural insight into cap-snatching and RNA synthesis by influenza polymerase. *Nature* 516, 361-366.

Sui J *et al.* 2009. Structural and functional bases for broad-spectrum neutralization of avian and human influenza A viruses. *Nat Struct Mol Biol* 16, 265-273.

van der Vries E *et al.* 2012. H1N1 2009 pandemic influenza virus: resistance of the I223R neuraminidase mutant explained by kinetic and structural analysis. *PLoS pathogens* 8, e1002914.

Venkatramani L *et al.* 2006. An epidemiologically significant epitope of a 1998 human influenza virus neuraminidase forms a highly hydrated interface in the NA-antibody complex. *J Mol Biol* 356, 651-663.

Wan H *et al.* 2015. Structural characterization of a protective epitope spanning A(H1N1)pdm09 influenza virus neuraminidase monomers. *Nat Commun* 6, 6114.

Wang J *et al.* 2013. Structure and inhibition of the drug-resistant S31N mutant of the M2 ion channel of influenza A virus. *Proceedings of the National Academy of Sciences of the United States of America* 110, 1315-1320.

Whitehead TA *et al.* 2012. Optimization of affinity, specificity and function of designed influenza inhibitors using deep sequencing. *Nat Biotechnol* 30, 543-548.

Whittle JR *et al.* 2011. Broadly neutralizing human antibody that recognizes the receptor-binding pocket of influenza virus hemagglutinin. *Proceedings of the National Academy of Sciences of the United States of America* 108, 14216-14221.

Xiong X *et al.* 2015. Structures of complexes formed by H5 influenza hemagglutinin with a potent broadly neutralizing human monoclonal antibody. *Proceedings of the National Academy of Sciences of the United States of America* 112, 9430-9435.

Xu R *et al.* 2010. Structural basis of preexisting immunity to the 2009 H1N1 pandemic influenza virus. *Science* 328, 357-360.

Yassine HM *et al.* 2015. Hemagglutinin-stem nanoparticles generate heterosubtypic influenza protection. *Nat Med* 21, 1065-1070.

Ye Q *et al.* 2012. Biochemical and structural evidence in support of a coherent model for the formation of the double-helical influenza A virus ribonucleoprotein. *mBio* 4, e00467-00412.
